# Supplementary material for: Positive Associations between Body Mass Index and Hematological Parameters, Including RBCs, WBCs, and Platelet Counts, in Korean Children and Adolescents
Source: MDPI journal article supplement (doi:10.3390/children9010109), 2022-01-14
Supplement: s1 [file s1]

## Supplementary Files

**Supplementary Table S1.** Clinical characteristics of the study participants by weight and sex ( $n = 7997$ )

|                                               | All participants     |                     |                     |         | Boys                 |                     |                     | Girls                |                     |                     | Statistical differences between boys and girls |         |         |
|-----------------------------------------------|----------------------|---------------------|---------------------|---------|----------------------|---------------------|---------------------|----------------------|---------------------|---------------------|------------------------------------------------|---------|---------|
|                                               | NW<br>( $n = 6421$ ) | OW<br>( $n = 782$ ) | OB<br>( $n = 794$ ) | $P$     | NW<br>( $n = 3350$ ) | OW<br>( $n = 443$ ) | OB<br>( $n = 466$ ) | NW<br>( $n = 3071$ ) | OW<br>( $n = 339$ ) | OB<br>( $n = 328$ ) | $P_a$                                          | $P_b$   | $P_c$   |
| Boys                                          | 3350                 | 443                 | 466                 | < 0.001 |                      |                     |                     |                      |                     |                     |                                                |         |         |
| Age (y)                                       | 14.33 ± 2.51         | 14.24 ± 2.51        | 14.78 ± 2.54        | < 0.001 | 14.35 ± 2.51         | 14.08 ± 2.49        | 14.56 ± 2.55        | 14.31 ± 2.51         | 14.44 ± 2.52        | 15.09 ± 2.50        | 0.498                                          | 0.042   | 0.004   |
| Height SDS                                    | 0.17 ± 1.03          | 0.47 ± 1.04         | 0.53 ± 1.11         | < 0.001 | 0.18 ± 1.04          | 0.55 ± 0.98         | 0.62 ± 1.07         | 0.16 ± 1.02          | 0.37 ± 1.11         | 0.40 ± 1.17         | 0.431                                          | 0.015   | 0.007   |
| Weight SDS                                    | -0.31 ± 0.89         | 1.29 ± 0.49         | 2.20 ± 0.74         | < 0.001 | -0.33 ± 0.90         | 1.31 ± 0.48         | 2.23 ± 0.74         | -0.28 ± 0.87         | 1.26 ± 0.49         | 2.16 ± 0.73         | 0.043                                          | 0.461   | 0.160   |
| BMI SDS (kg/m <sup>2</sup> )                  | -0.59 ± 0.88         | 0.86 ± 0.45         | 1.64 ± 0.75         | < 0.001 | -0.65 ± 0.88         | 0.87 ± 0.38         | 1.62 ± 0.65         | -0.52 ± 0.86         | 0.85 ± 0.53         | 1.68 ± 0.88         | < 0.001                                        | 0.962   | 0.278   |
| WC SDS                                        | -0.49 ± 0.85         | 1.32 ± 0.18         | 2.40 ± 0.67         | < 0.001 | -0.53 ± 0.87         | 1.32 ± 0.18         | 2.41 ± 0.65         | -0.45 ± 0.83         | 1.32 ± 0.18         | 2.39 ± 0.68         | < 0.001                                        | < 0.001 | 0.673   |
| SBP (mmHg)                                    | 105.65 ± 9.77        | 109.94 ± 10.28      | 113.68 ± 10.95      | < 0.001 | 107.53 ± 10.09       | 112.69 ± 10.29      | 116.15 ± 10.73      | 103.60 ± 8.96        | 106.35 ± 9.10       | 110.18 ± 10.29      | < 0.001                                        | 0.128   | < 0.001 |
| DBP (mmHg)                                    | 65.59 ± 8.91         | 66.88 ± 8.88        | 69.07 ± 9.19        | < 0.001 | 65.82 ± 9.48         | 67.29 ± 9.75        | 69.45 ± 9.58        | 65.33 ± 8.25         | 66.34 ± 7.58        | 68.53 ± 8.59        | 0.028                                          | 0.527   | 0.157   |
| WBC (×10 <sup>3</sup> /mm <sup>3</sup> )      | 6.16 ± 1.49          | 6.65 ± 1.58         | 7.16 ± 1.65         | < 0.001 | 6.13 ± 1.45          | 6.68 ± 1.53         | 7.13 ± 1.60         | 6.18 ± 1.53          | 6.61 ± 1.64         | 7.22 ± 1.71         | 0.163                                          | < 0.001 | 0.432   |
| RBC (×10 <sup>3</sup> /mm <sup>3</sup> )      | 4.81 ± 0.39          | 4.89 ± 0.40         | 4.93 ± 0.41         | < 0.001 | 5.02 ± 0.34          | 5.10 ± 0.34         | 5.13 ± 0.33         | 4.59 ± 0.31          | 4.62 ± 0.30         | 4.63 ± 0.31         | < 0.001                                        | < 0.001 | < 0.001 |
| Hemoglobin (g/dL)                             | 13.97 ± 1.23         | 14.07 ± 1.22        | 14.19 ± 1.30        | < 0.001 | 14.60 ± 1.11         | 14.64 ± 1.15        | 14.79 ± 1.20        | 13.28 ± 0.96         | 13.33 ± 0.85        | 13.34 ± 0.92        | < 0.001                                        | < 0.001 | < 0.001 |
| Hematocrit (%)                                | 41.86 ± 3.40         | 42.28 ± 3.42        | 42.65 ± 3.53        | < 0.001 | 43.43 ± 3.30         | 43.73 ± 3.38        | 44.18 ± 3.34        | 40.15 ± 2.60         | 40.38 ± 2.42        | 40.49 ± 2.50        | < 0.001                                        | 0.431   | < 0.001 |
| Platelet (×10 <sup>3</sup> /mm <sup>3</sup> ) | 282.96 ± 58.58       | 296.81 ± 59.92      | 309.03 ± 63.53      | < 0.001 | 278.59 ± 58.48       | 295.33 ± 61.62      | 302.91 ± 61.66      | 287.73 ± 58.32       | 298.74 ± 57.65      | 317.73 ± 65.21      | < 0.001                                        | 0.133   | 0.001   |
| Glucose (mg/dL)                               | 90.01 ± 7.39         | 91.83 ± 11.05       | 92.45 ± 12.16       | < 0.001 | 90.69 ± 6.89         | 92.89 ± 13.37       | 92.53 ± 6.71        | 89.26 ± 7.84         | 90.44 ± 6.69        | 92.34 ± 17.16       | < 0.001                                        | 0.001   | 0.851   |
| T-C (mg/dL)                                   | 158.25 ± 26.27       | 163.00 ± 28.46      | 169.35 ± 29.50      | < 0.001 | 153.81 ± 25.90       | 161.35 ± 29.78      | 168.12 ± 30.10      | 163.10 ± 25.81       | 165.17 ± 26.52      | 171.09 ± 28.57      | < 0.001                                        | 0.059   | 0.163   |
| HDL-C (mg/dL)                                 | 52.16 ± 9.94         | 47.68 ± 8.63        | 44.99 ± 8.37        | < 0.001 | 51.13 ± 9.93         | 46.10 ± 8.33        | 44.27 ± 7.98        | 53.27 ± 9.82         | 49.75 ± 8.59        | 46.01 ± 8.80        | < 0.001                                        | < 0.001 | 0.004   |
| TG (mg/dL)                                    | 79.29 ± 41.79        | 99.34 ± 54.29       | 112.75 ± 58.76      | < 0.001 | 76.49 ± 42.07        | 103.29 ± 58.81      | 110.92 ± 58.64      | 82.33 ± 41.26        | 94.17 ± 47.33       | 115.34 ± 58.91      | < 0.001                                        | 0.017   | 0.297   |
| LDL-C (mg/dL)                                 | 90.24 ± 22.42        | 95.46 ± 25.07       | 101.81 ± 25.63      | < 0.001 | 87.38 ± 22.08        | 94.59 ± 26.15       | 101.67 ± 26.28      | 93.36 ± 22.38        | 96.58 ± 23.57       | 102.02 ± 24.72      | < 0.001                                        | 0.264   | 0.849   |
| Alcohol use                                   | 1564 (24.36%)        | 188 (24.04%)        | 237 (29.85%)        | 0.003   | 888 (26.51%)         | 110 (24.83%)        | 142 (30.47%)        | 676 (22.01%)         | 78 (23.01%)         | 95 (28.96%)         | < 0.001                                        | 0.613   | 0.705   |
| Smoker                                        | 718 (11.18%)         | 88 (11.25%)         | 106 (13.35%)        | 0.191   | 524 (15.64%)         | 61 (13.77%)         | 77 (16.52%)         | 194 (6.32%)          | 27 (7.96%)          | 29 (8.84%)          | < 0.001                                        | 0.015   | 0.002   |
| Household income ≤ 1st quartile               | 687 (10.70%)         | 82 (10.49%)         | 95 (11.96%)         | 0.531   | 362 (10.81%)         | 39 (8.80%)          | 50 (10.73%)         | 325 (10.58%)         | 43 (12.68%)         | 45 (13.72%)         | 0.804                                          | 0.102   | 0.243   |
| Rural residence                               | 985 (15.34%)         | 113 (14.45%)        | 125 (15.74%)        | 0.757   | 518 (15.46%)         | 60 (13.54%)         | 69 (14.81%)         | 467 (15.21%)         | 53 (15.63%)         | 56 (17.07%)         | 0.803                                          | 0.471   | 0.445   |
| Physical activity                             | 2368 (36.88%)        | 279 (35.68%)        | 316 (39.80%)        | 0.194   | 1351 (40.33%)        | 171 (38.60%)        | 183 (39.27%)        | 1017 (33.12%)        | 108 (31.86%)        | 133 (40.55%)        | < 0.001                                        | 0.061   | 0.773   |
| Hypertension                                  | 1 (0.02%)            | 1 (0.13%)           | 1 (0.13%)           | 0.124   | 1 (0.03%)            | 1 (0.23%)           | 0 (0%)              | 0 (0%)               | 0 (0%)              | 1 (0.3%)            | > 0.999                                        | > 0.999 | 0.860   |
| T2DM                                          | 0 (0%)               | 0 (0%)              | 0 (0%)              | > 0.999 | 0 (0%)               | 0 (0%)              | 0 (0%)              | 0 (0%)               | 0 (0%)              | 0 (0%)              | > 0.999                                        | > 0.999 | > 0.999 |
| Dyslipidemia                                  | 0 (0%)               | 0 (0%)              | 0 (0%)              | > 0.999 | 0 (0%)               | 0 (0%)              | 0 (0%)              | 0 (0%)               | 0 (0%)              | 0 (0%)              | > 0.999                                        | > 0.999 | > 0.999 |

SDS, standard deviation score; BMI, body mass index; WC, waist circumference; SBP, systolic blood pressure; DBP, diastolic blood pressure; WBC, white blood cell; RBC, red blood cell; T-C, total cholesterol; HDL-C, high-density lipoprotein cholesterol; TG, triglycerides; LDL-C, low-density lipoprotein cholesterol; T2DM, type 2 diabetes mellitus;  $P_a$ : statistical difference between normal weight boys and girls,  $P_b$ : statistical difference between overweight boys and girls,  $P_c$ : statistical difference between obese boys and girls
